# Supplementary material for: Distinct responses to rare codons in select Drosophila tissues
Source: eLife journal article supplement (doi:10.7554/elife.76893), 2022-05-06
Supplement: supp [file elife_poa_e76893_Figure_3_figure_supplement_4.pdf › elife_poa_e76893_Figure_3_figure_supplement_4.pdf]

### Figure 3 - Figure Supplement 4

**A**

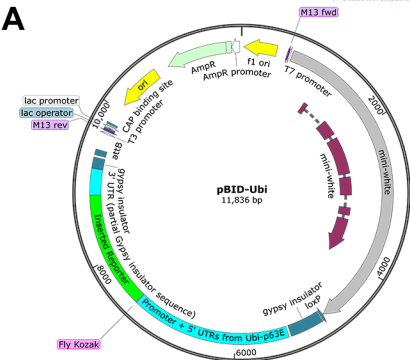

# B

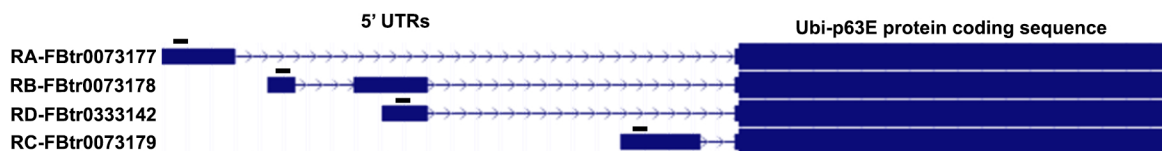

C

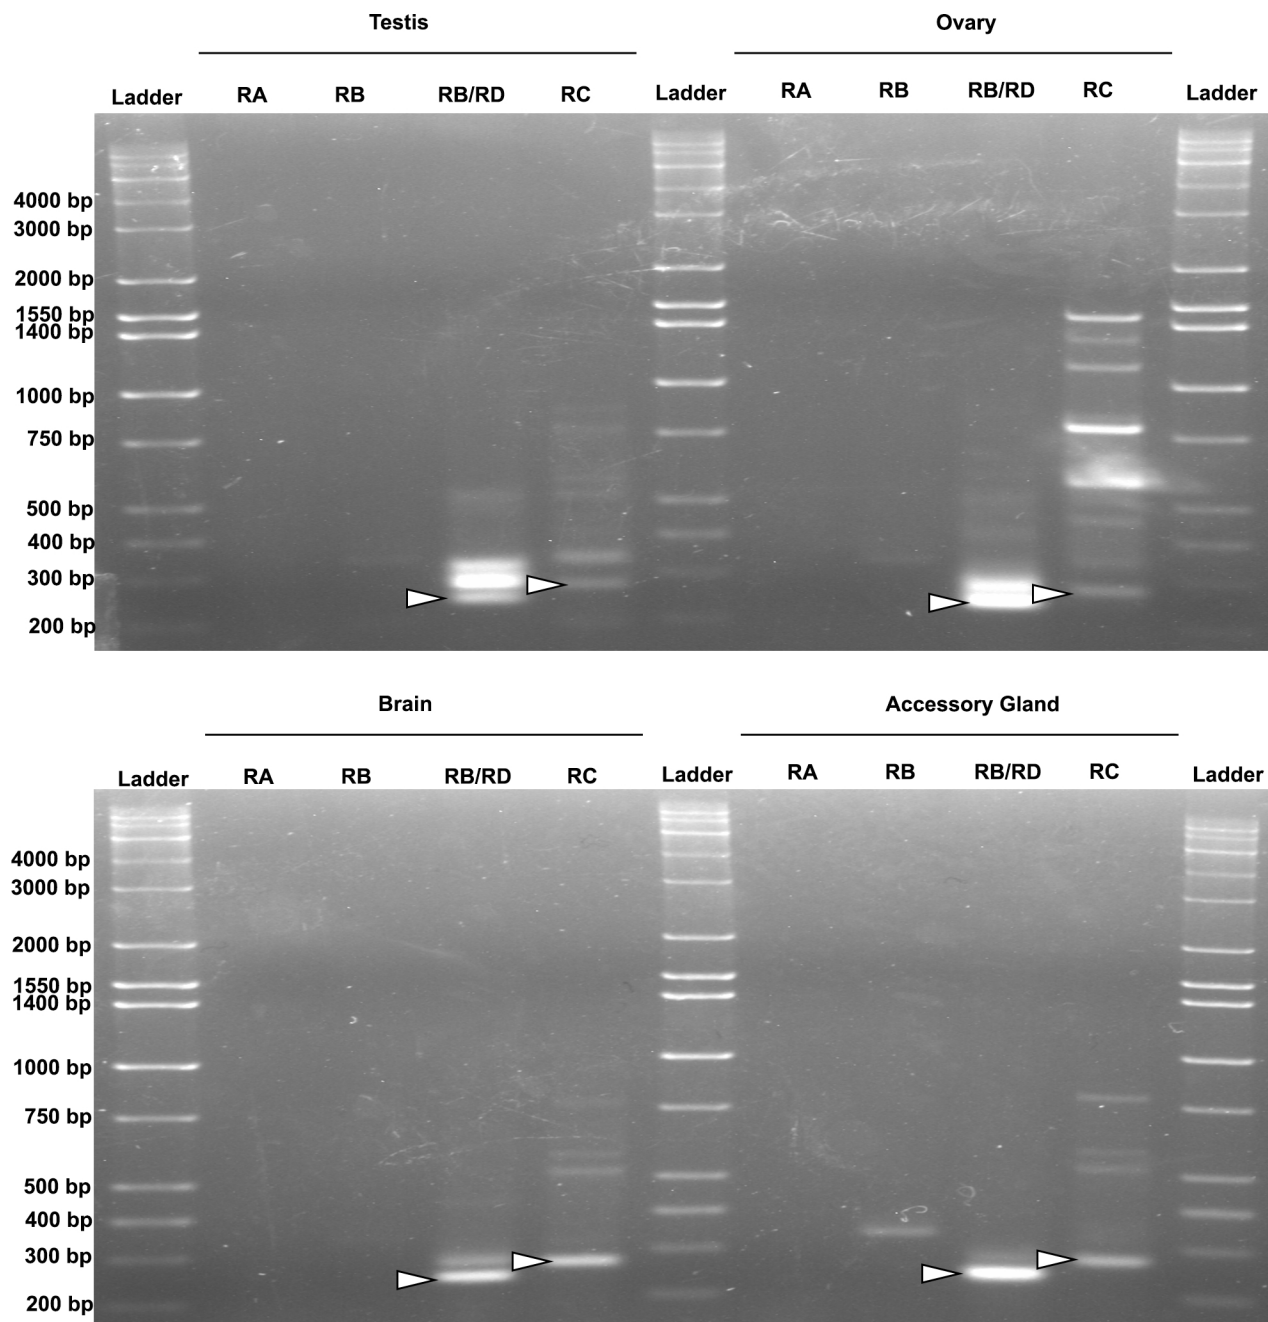

## D

| Primer pair | Expected size (without splicing) | Expected size (with splicing) |
|-------------|----------------------------------|-------------------------------|
| RA          | 1522                             | 289                           |
| RB          | 1282                             | 393                           |
| RB/RD       | 1002                             | 246                           |
| RC          | 274                              | 190                           |
