# Supplementary material for: Distinct responses to rare codons in select Drosophila tissues
Source: eLife journal article supplement (doi:10.7554/elife.76893), 2022-05-06

**Total Protein Stain Fig1R.** \* indicates identical  
GFP0D lysate added for between gels comparisons.

**60Dv2 60Dv3 70D 80D 0D**

\*

**0D**

**30D**

**50D**

**60Dv1**

\*

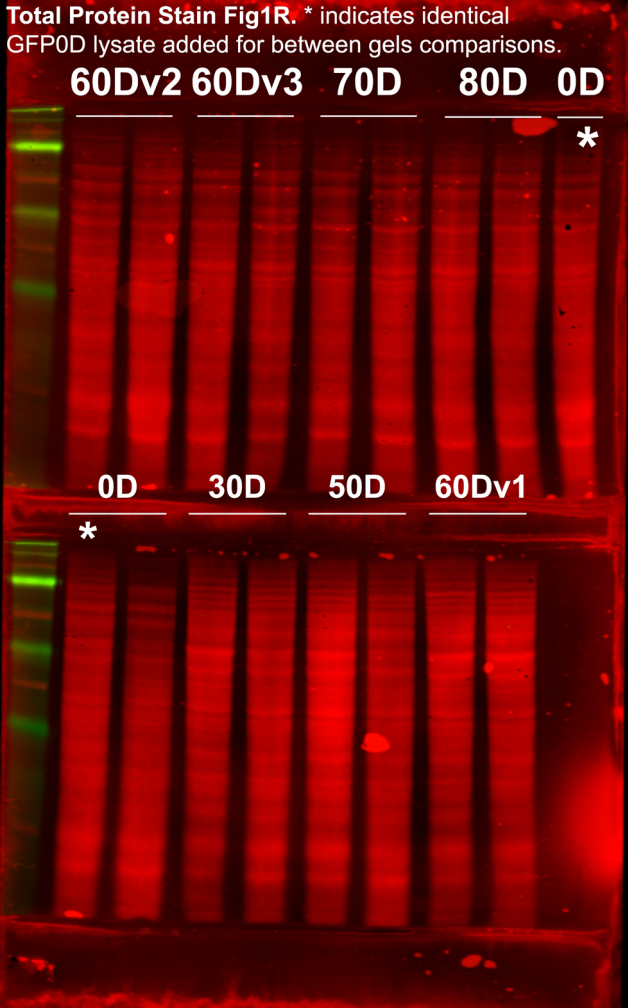

Supplement: supp [file Figure1-FigureSupplement1-SourceData2.pdf › SourceData/Figure1-FigureSupplement1-SourceData2.pdf]
