# Supplementary material for: Distinct responses to rare codons in select Drosophila tissues
Source: eLife journal article supplement (doi:10.7554/elife.76893), 2022-05-06
Supplement: supp [file Figure1-FigureSupplement1-SourceData3.pdf › SourceData/Figure1-FigureSupplement1-SourceData3.pdf]



[Unrelated blot]

**Reporter GFP levels Fig1R.** \* indicates identical GFP0D lysate added for between gels comparisons.

**90D**

**100D**

**50C3'**

**50C5'**

**0D**

**\***
