# Supplementary material for: Distinct responses to rare codons in select Drosophila tissues
Source: eLife journal article supplement (doi:10.7554/elife.76893), 2022-05-06

**Reporter GFP levels Fig1R.** \* indicates identical GFP0D lysate added for between gels comparisons.

**0D    60C3'    70C3'    80C3'    90C3'**

**\***

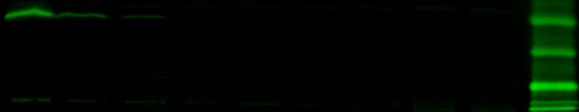

Supplement: supp [file Figure1-FigureSupplement1-SourceData5.pdf › SourceData/Figure1-FigureSupplement1-SourceData5.pdf]
