# Supplementary material for: Distinct responses to rare codons in select Drosophila tissues
Source: eLife journal article supplement (doi:10.7554/elife.76893), 2022-05-06
Supplement: supp [file Figure1-FigureSupplement1-SourceData6.pdf › SourceData/Figure1-FigureSupplement1-SourceData6.pdf]

0D 60C3' 70C3' 80C3' 90C3'

\*

**Total Protein Stain Fig1R.** \* indicates identical GFP0D lysate added for between gels comparisons.

[Unrelated blot. Membrane cut to separate blots after total protein stain.]
