# Supplementary material for: Distinct responses to rare codons in select Drosophila tissues
Source: eLife journal article supplement (doi:10.7554/elife.76893), 2022-05-06

**Fig3M. Biological Replicate 3 - anti-GFP Signal.** \* indicates same GFP0D testis lysate added for between gels normalization.

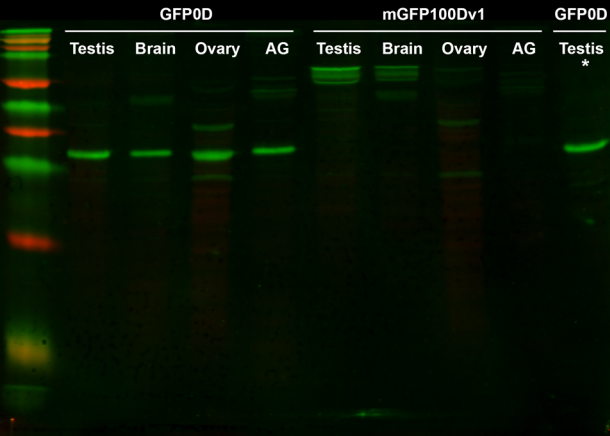

Supplement: supp [file Figure3-FigureSupplement1-SourceData1.pdf › SourceData/Figure3-FigureSupplement1-SourceData1.pdf]
