# Supplementary material for: Distinct responses to rare codons in select Drosophila tissues
Source: eLife journal article supplement (doi:10.7554/elife.76893), 2022-05-06
Supplement: supp [file Figure3-FigureSupplement1-SourceData2.pdf › SourceData/Figure3-FigureSupplement1-SourceData2.pdf]

**Fig3M. Biological Replicate 3 - anti-GFP Signal.** \* indicates same GFP0D testis lysate added for between gels normalization.

| GFP0D  |       |       |    | mGFP100Dv1 |       |       |    | GFP0D    |
|--------|-------|-------|----|------------|-------|-------|----|----------|
| Testis | Brain | Ovary | AG | Testis     | Brain | Ovary | AG | Testis * |

[Unrelated blot. Blots cut to separate after total protein stain]
