# Supplementary material for: Distinct responses to rare codons in select Drosophila tissues
Source: eLife journal article supplement (doi:10.7554/elife.76893), 2022-05-06

**Fig3M. GFP0D Biological Replicates 1&2 - anti-GFP Signal.** \*Indicates same GFP0D testis lysate added for between gels normalization.

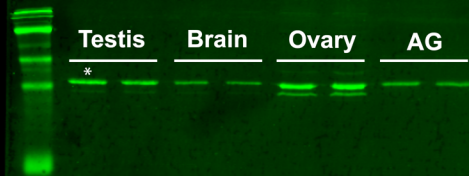

**Fig3M. mGFP100Dv1 Biological Replicates 1&2 - anti-GFP Signal**

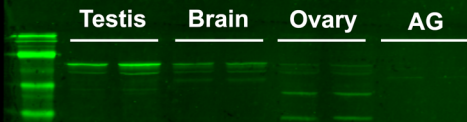

Supplement: supp [file Figure3-FigureSupplement1-SourceData3.pdf › SourceData/Figure3-FigureSupplement1-SourceData3.pdf]
