# Supplementary material for: Distinct responses to rare codons in select Drosophila tissues
Source: eLife journal article supplement (doi:10.7554/elife.76893), 2022-05-06
Supplement: supp [file Figure3-FigureSupplement1-SourceData4.pdf › SourceData/Figure3-FigureSupplement1-SourceData4.pdf]

**Testis****Brain****Ovary****AG**

\*

**Top:****Fig3M. GFP0D Biological Replicates 1&2 - Total Protein Stain.**

\*Indicates same GFP0D testis lysate added for between gels normalization (replicates 1&2 vs replicate 3).

**Bottom:****Fig3M. mGFP100Dv1 Biological Replicates 1&2 - Total Protein Stain****Testis****Brain****Ovary****AG**
