# Supplementary material for: Distinct responses to rare codons in select Drosophila tissues
Source: eLife journal article supplement (doi:10.7554/elife.76893), 2022-05-06

**This gel not presented in paper.  
(Note ladder orientation)**

**3x-FLAG Rpl10Aa Endo reporter expression**

**Testis   Testis   Gut   Gut   Head   Head   Ovary   Ovary**

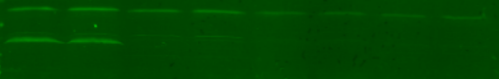

Supplement: supp [file Figure5-FigureSupplement1-SourceData1.pdf › SourceData/Figure5-FigureSupplement1-SourceData1.pdf]
