# Supplementary material for: Distinct responses to rare codons in select Drosophila tissues
Source: eLife journal article supplement (doi:10.7554/elife.76893), 2022-05-06
Supplement: supp [file Figure5-FigureSupplement1-SourceData2.pdf › SourceData/Figure5-FigureSupplement1-SourceData2.pdf]

Revert700 Total Protein Stain

Testis Testis Gut Gut Head Head Ovary Ovary

**This gel not presented in paper.  
(Note ladder orientation)**
