# Supplementary material for: Distinct responses to rare codons in select Drosophila tissues
Source: eLife journal article supplement (doi:10.7554/elife.76893), 2022-05-06



[Unrelated blot. Membrane cut to separate blots after total protein stain]

Fig5E. RpL10Aa transgene expressing young adult ovary  
Total Protein Stain

RpL10Aa Endo

RpL10Aa Com

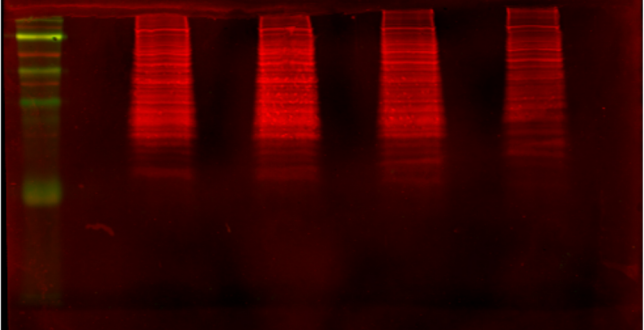

Supplement: supp [file Figure5-FigureSupplement2-SourceData2.pdf › SourceData/Figure5-FigureSupplement2-SourceData2.pdf]
