# Supplementary material for: Distinct responses to rare codons in select Drosophila tissues
Source: eLife journal article supplement (doi:10.7554/elife.76893), 2022-05-06

[Unrelated Blot]

**Fig5E. RpL10Aa transgene expressing adult testis**  
**Total Protein Stain**

RpL10Aa Endo RpL10Aa Com

<8 hr old  
RpL10Aa Endo  
<8 hr old  
RpL10Aa Com

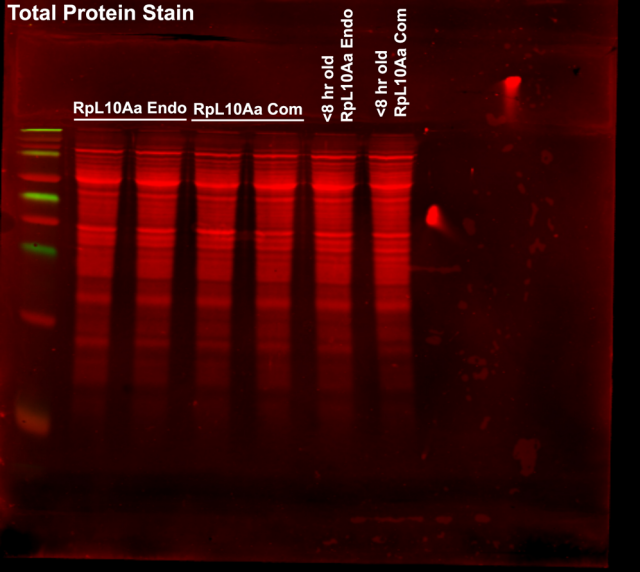

Supplement: supp [file Figure5-FigureSupplement2-SourceData4.pdf › SourceData/Figure5-FigureSupplement2-SourceData4.pdf]
