# Supplementary figures and images for: Distinct responses to rare codons in select Drosophila tissues
Source: eLife journal article supplement (doi:10.7554/elife.76893), 2022-05-06

**Reporter GFP levels Fig1R.** \* indicates identical GFP0D lysate added for between gels comparisons.

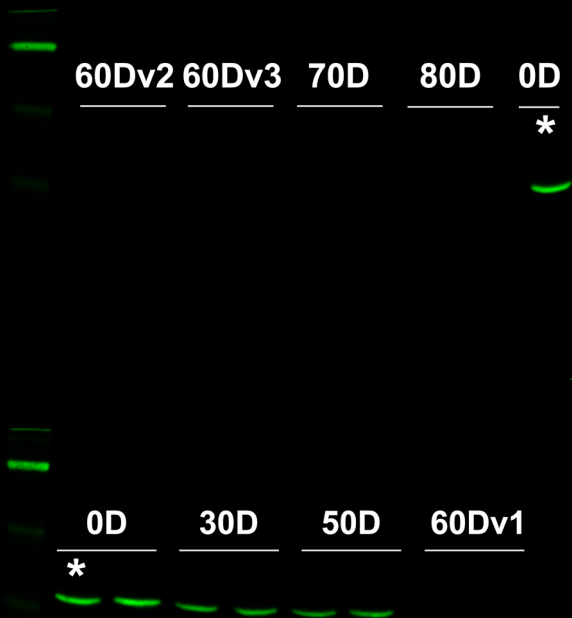

Supplement: supp [file Figure1-FigureSupplement1-SourceData1.pdf › SourceData/Figure1-FigureSupplement1-SourceData1.pdf]

**Fig5E. RpL10Aa transgene expressing young adult ovary anti-FLAG (RpL10Aa) Signal**

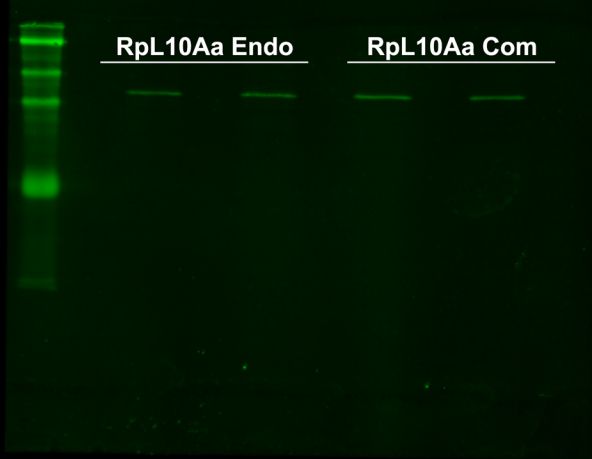

Supplement: supp [file Figure5-FigureSupplement2-SourceData1.pdf › SourceData/Figure5-FigureSupplement2-SourceData1.pdf]

Fig5E. RpL10Aa transgene expressing adult testis  
anti-FLAG (RpL10Aa) signal

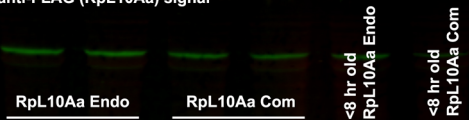

Supplement: supp [file Figure5-FigureSupplement2-SourceData3.pdf › SourceData/Figure5-FigureSupplement2-SourceData3.pdf]

Figure 1-Figure Supplement 1

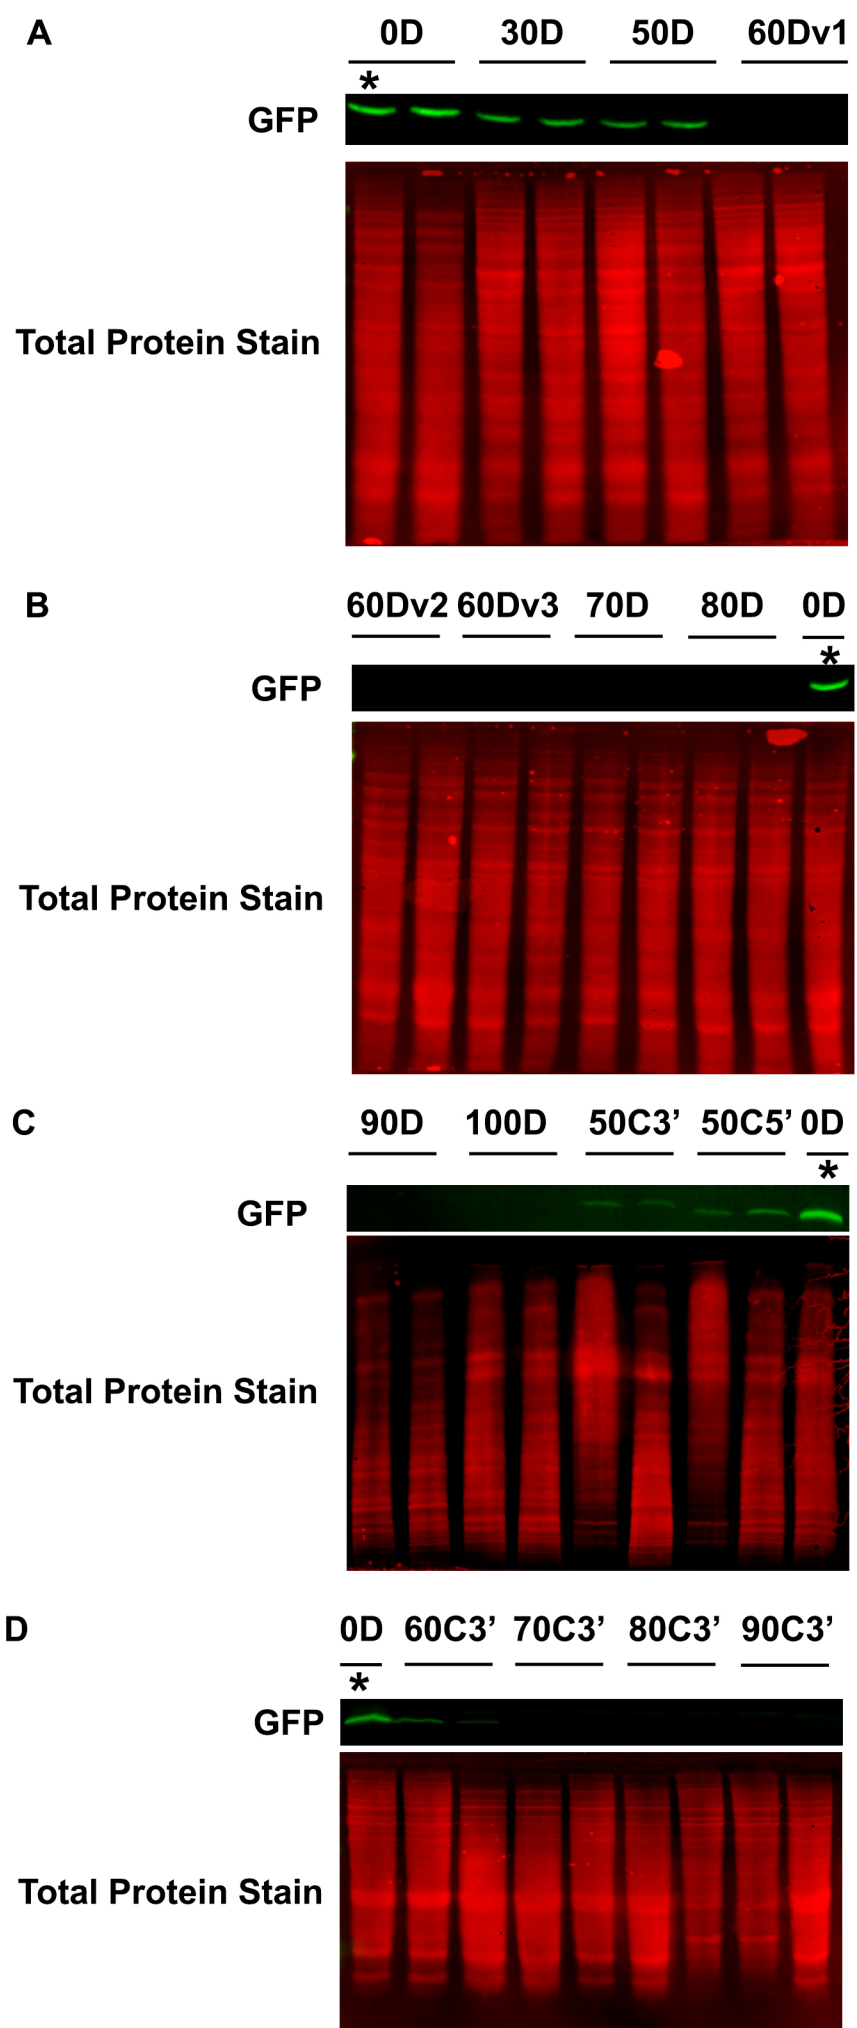

Supplement: supp [file elife_poa_e76893_Figure_1_figure_supplement_1.pdf › elife_poa_e76893_Figure_1_figure_supplement_1.pdf]

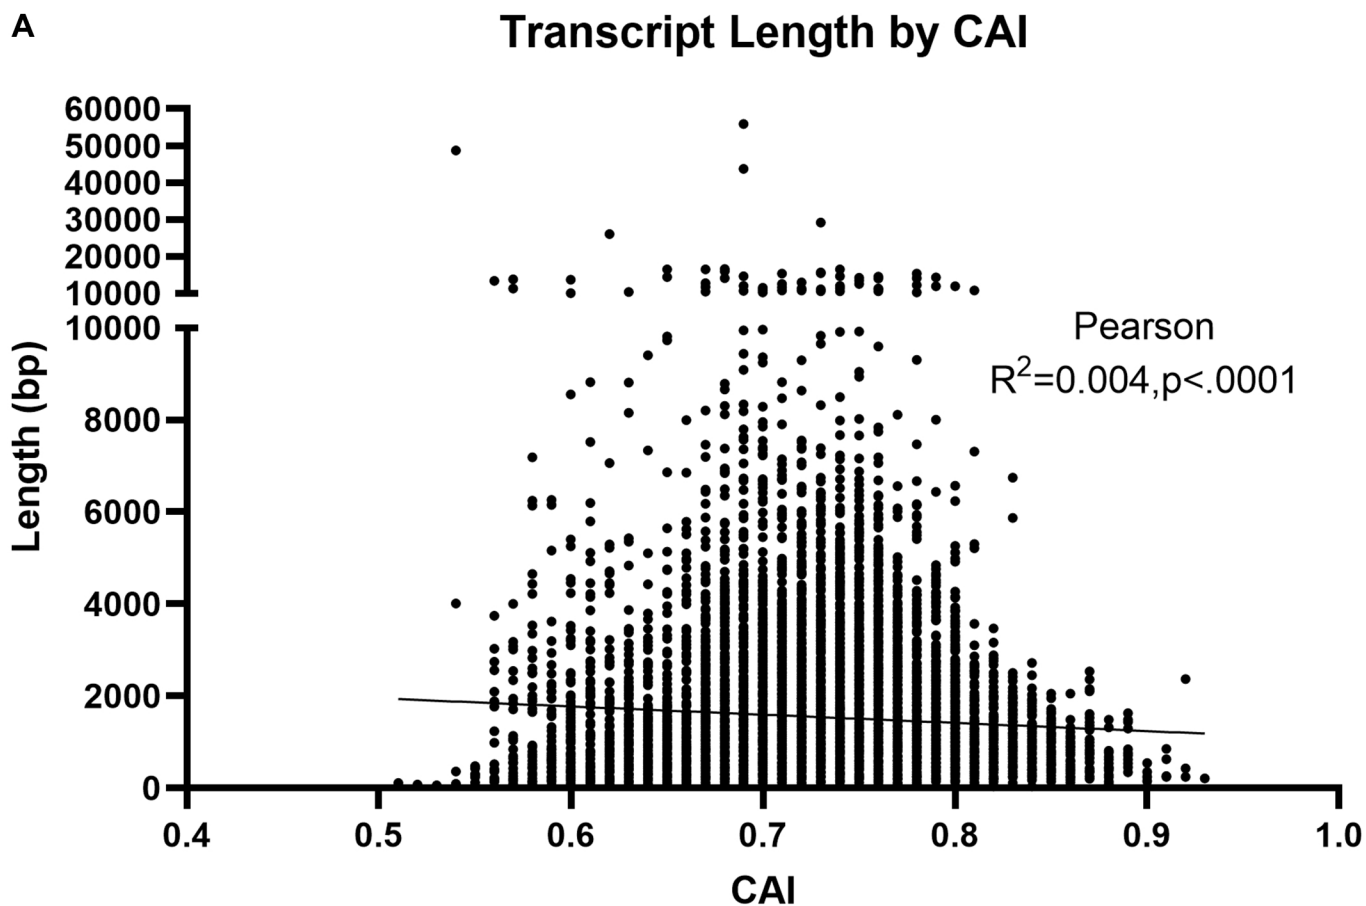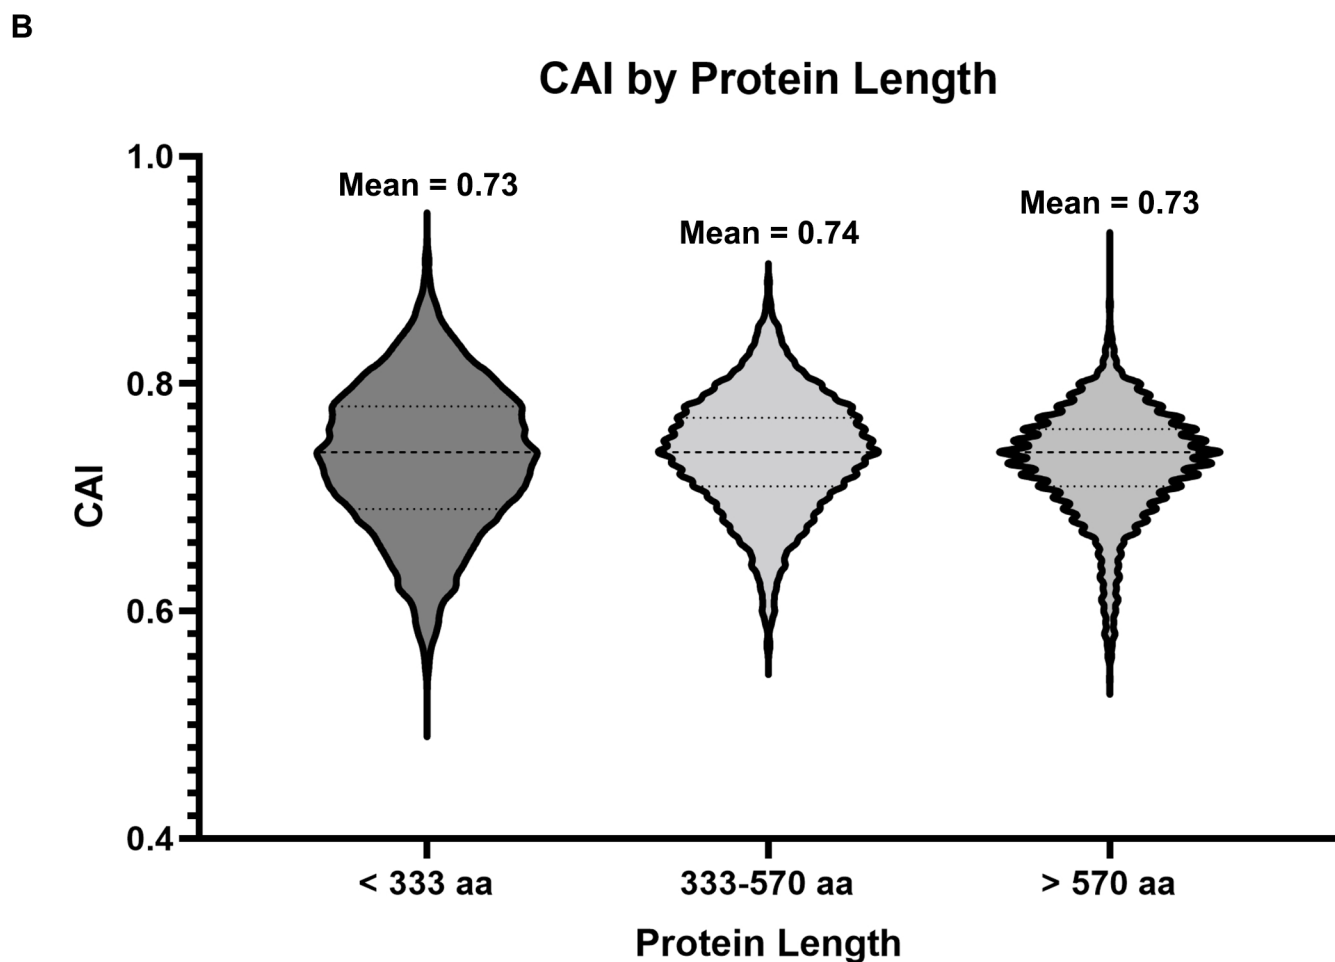

Supplement: supp [file elife_poa_e76893_Figure_1_figure_supplement_2.pdf › elife_poa_e76893_Figure_1_figure_supplement_2.pdf]

Figure 2-Figure Supplement 1

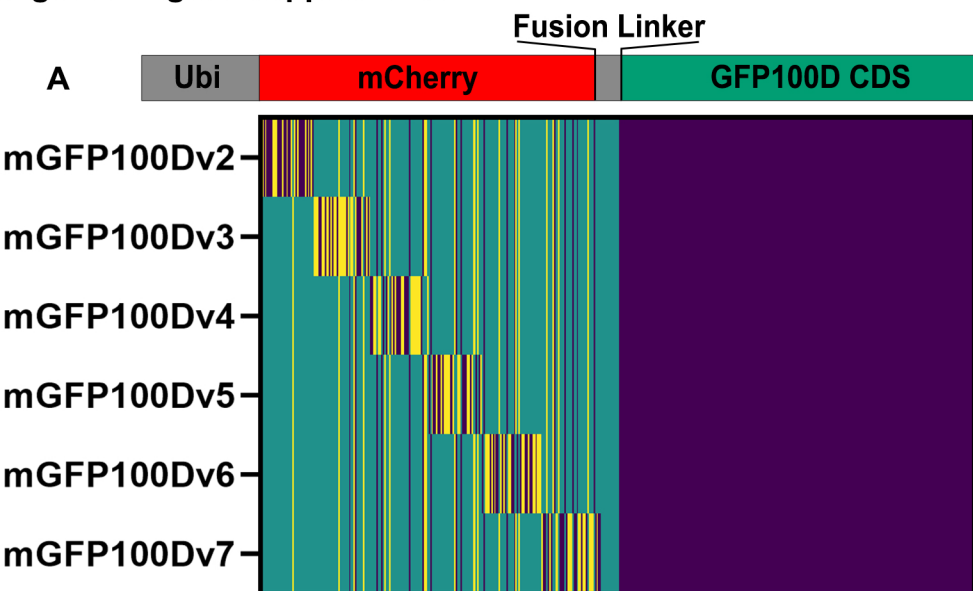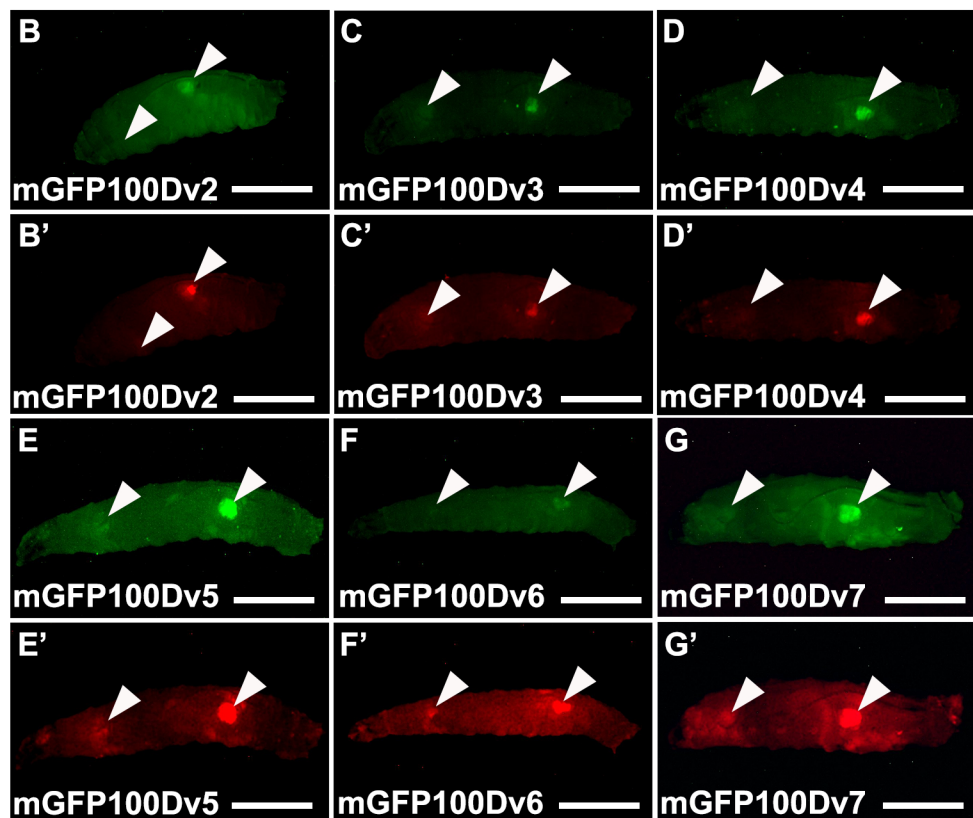

Supplement: supp [file elife_poa_e76893_Figure_2_figure_supplement_1.pdf › elife_poa_e76893_Figure_2_figure_supplement_1.pdf]

Figure 3-Figure Supplement 1

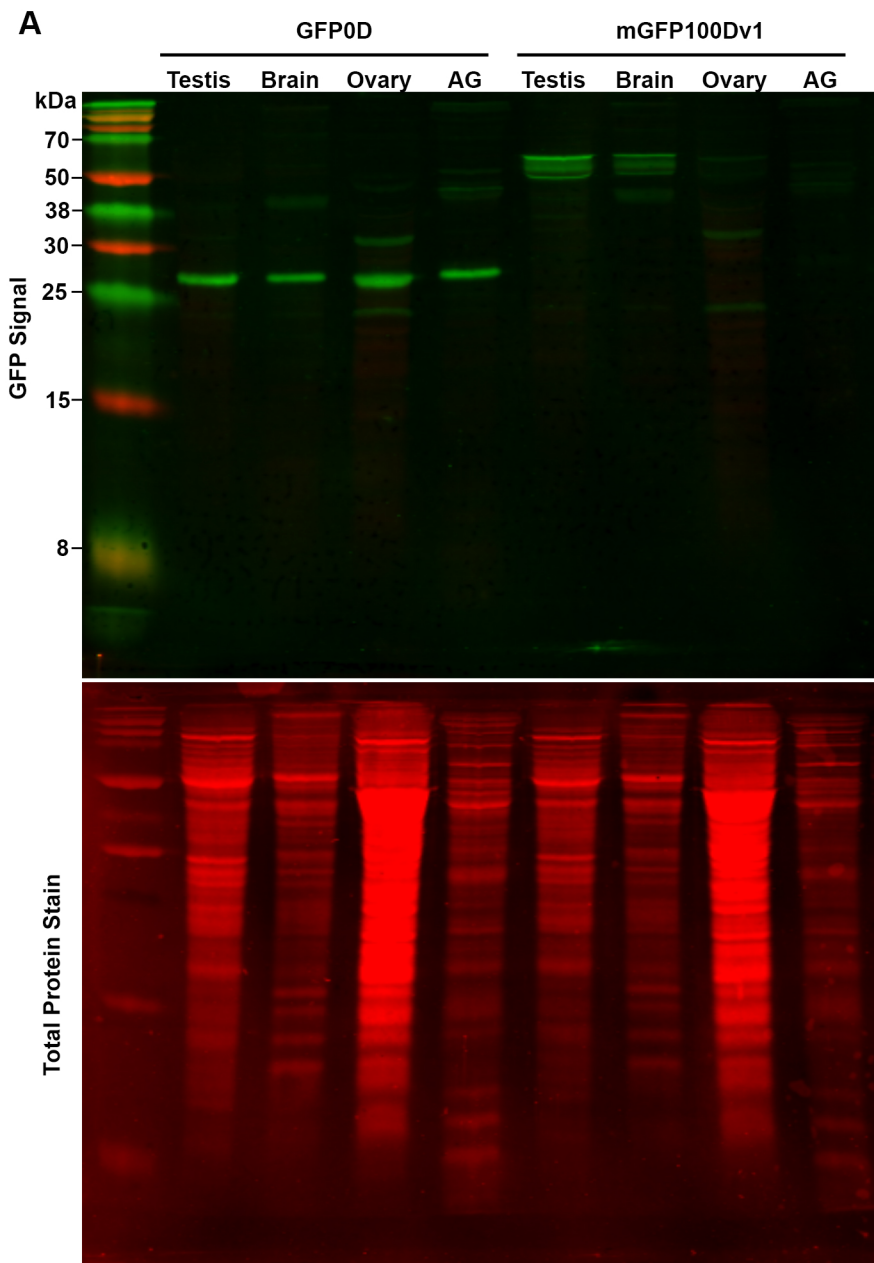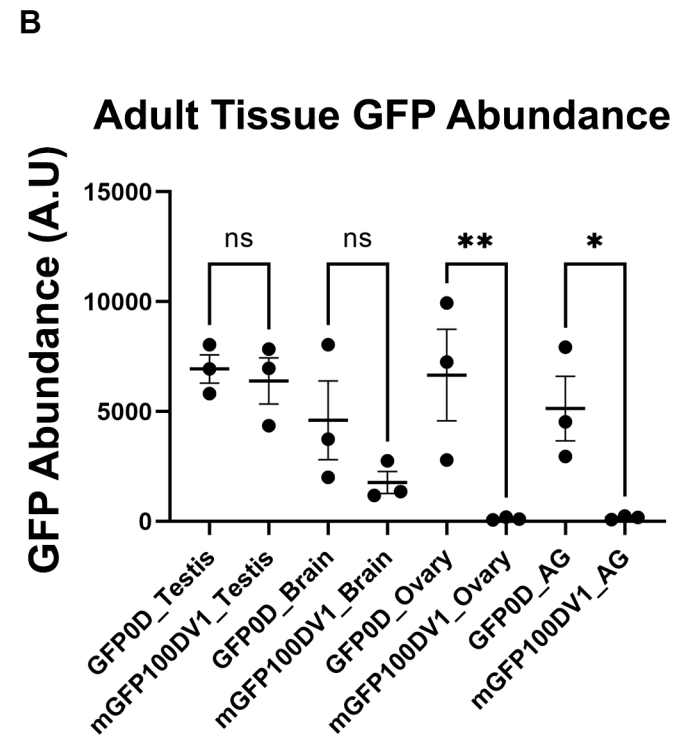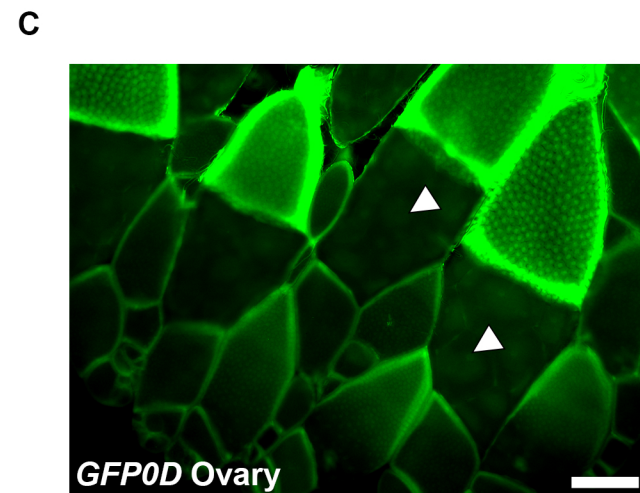

Supplement: supp [file elife_poa_e76893_Figure_3_figure_supplement_1.pdf › elife_poa_e76893_Figure_3_figure_supplement_1.pdf]

Figure 3-Figure Supplement 2

*w<sup>1118</sup>* (Wildtype) ♂

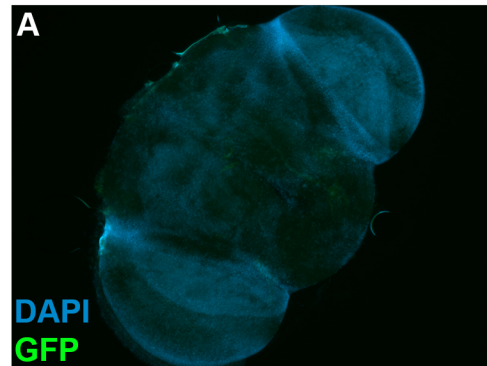

*mGFP100Dv1* ♂

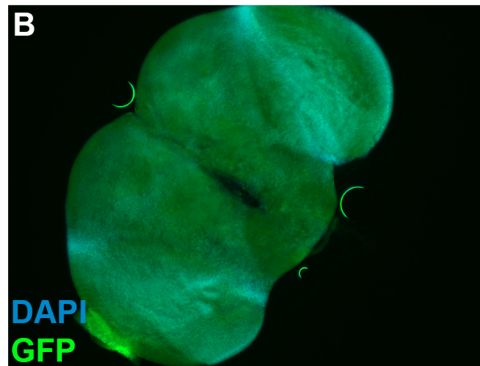

*mGFP100Dv1* ♀

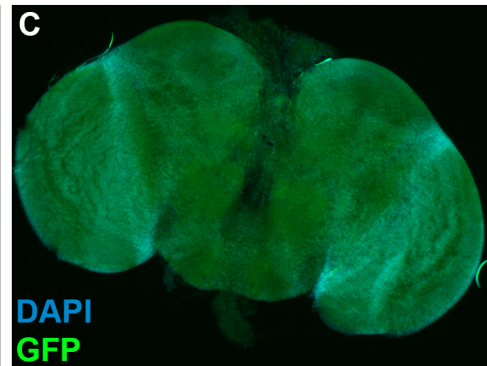

Supplement: supp [file elife_poa_e76893_Figure_3_figure_supplement_2.pdf › elife_poa_e76893_Figure_3_figure_supplement_2.pdf]

Figure 3 - Figure Supplement 3

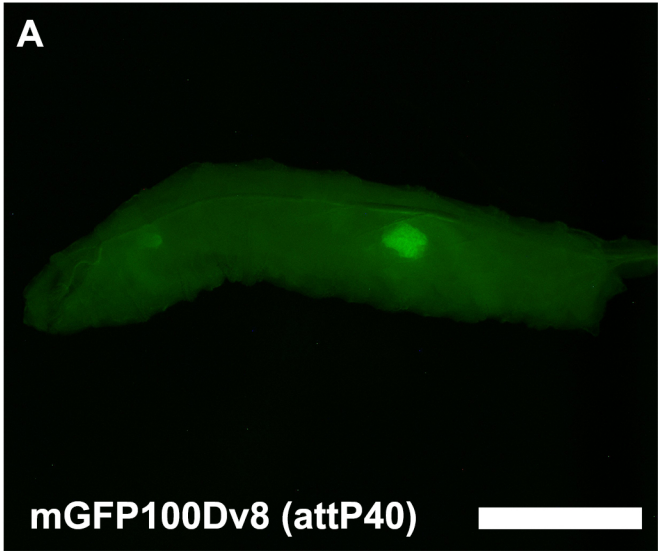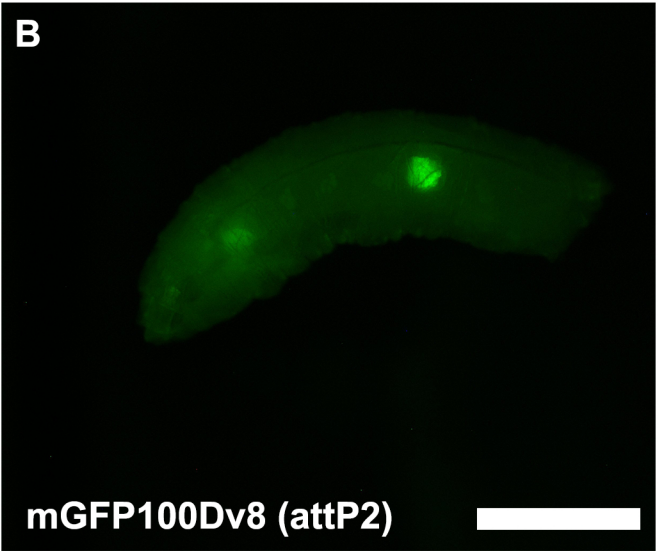

Supplement: supp [file elife_poa_e76893_Figure_3_figure_supplement_3.pdf › elife_poa_e76893_Figure_3_figure_supplement_3.pdf]

Figure 4 - Figure Supplement 1

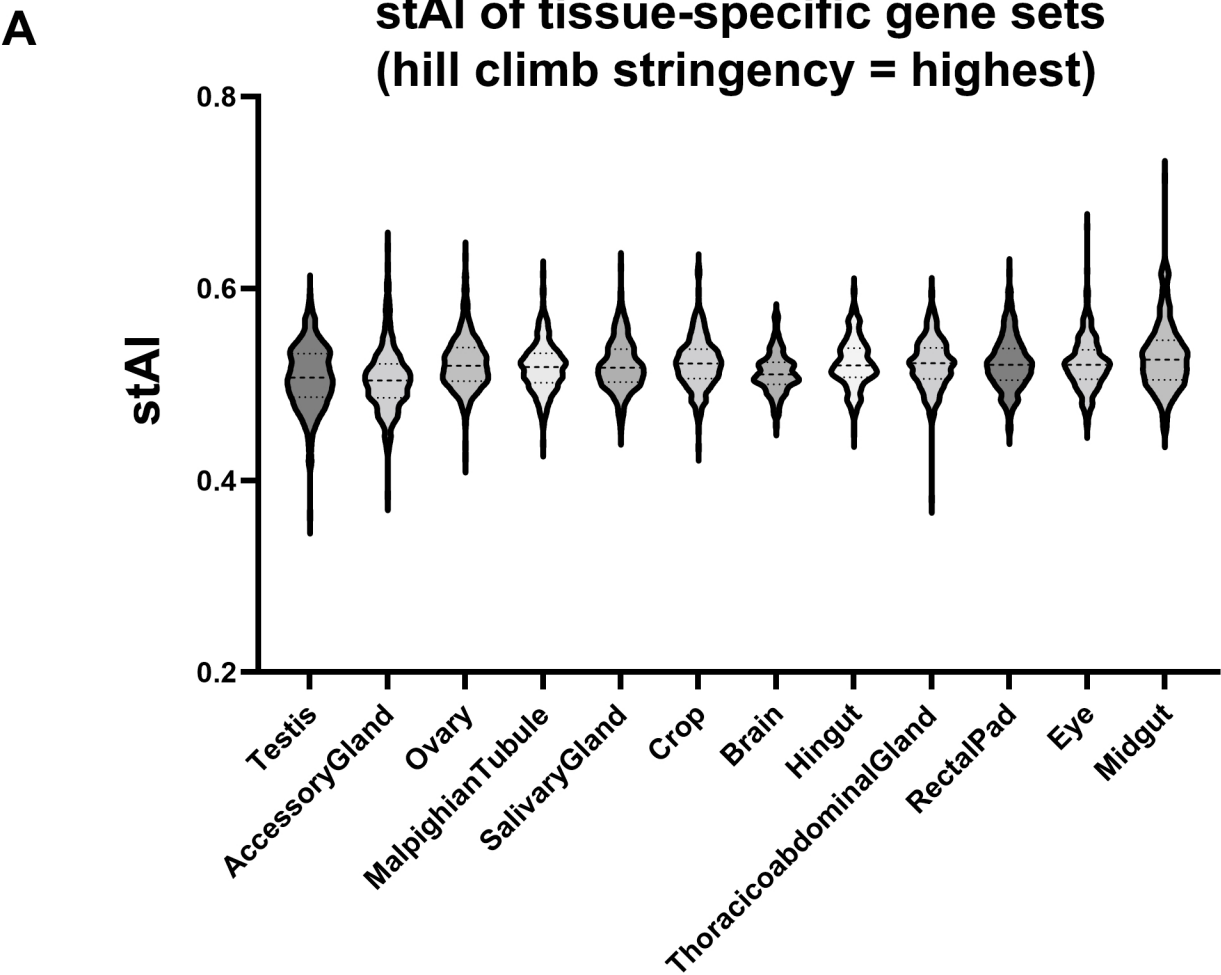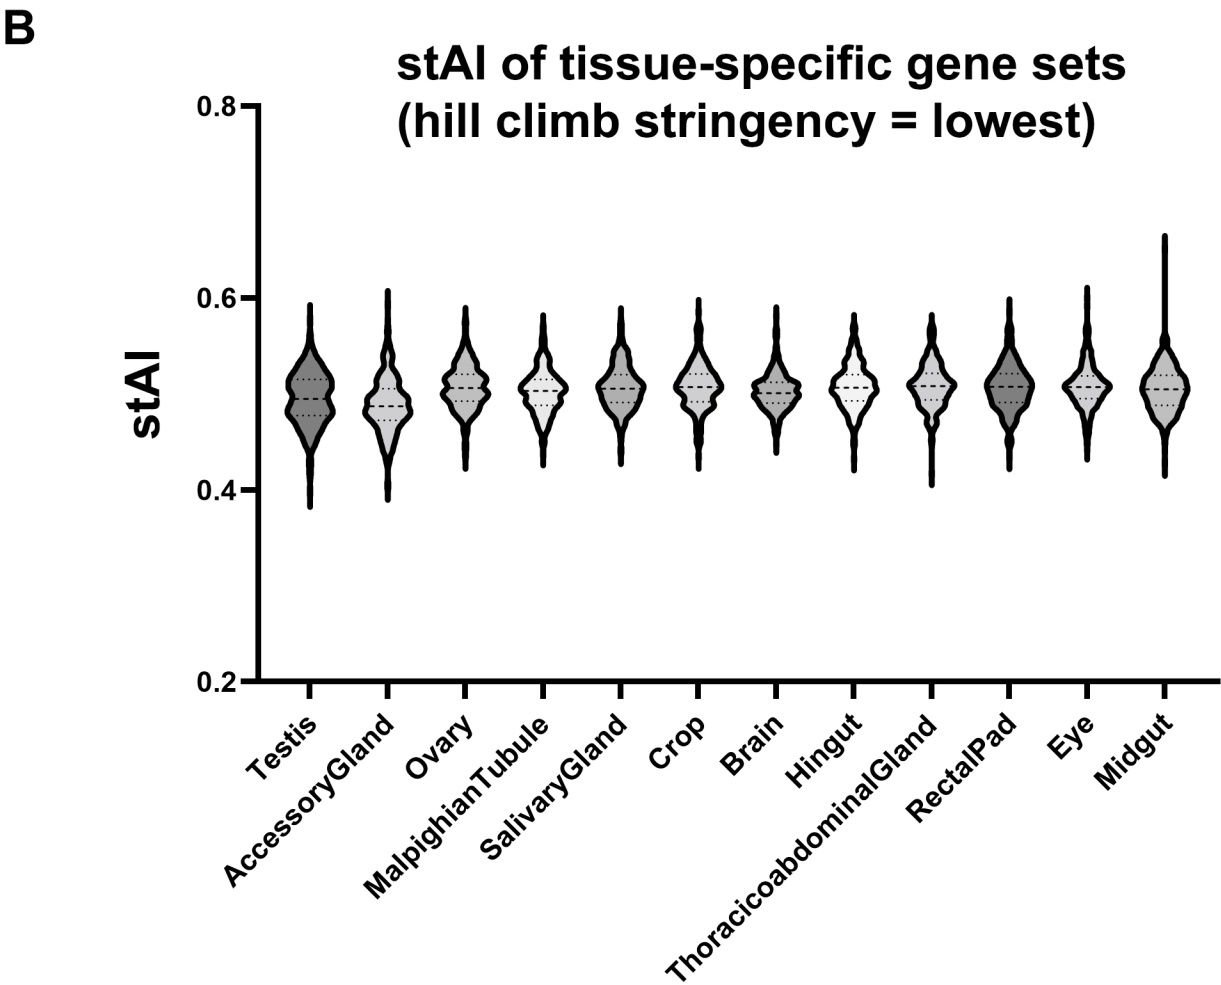

Supplement: supp [file elife_poa_e76893_Figure_4_figure_supplement_1.pdf › elife_poa_e76893_Figure_4_figure_supplement_1.pdf]

Figure 4-Figure Supplement 2

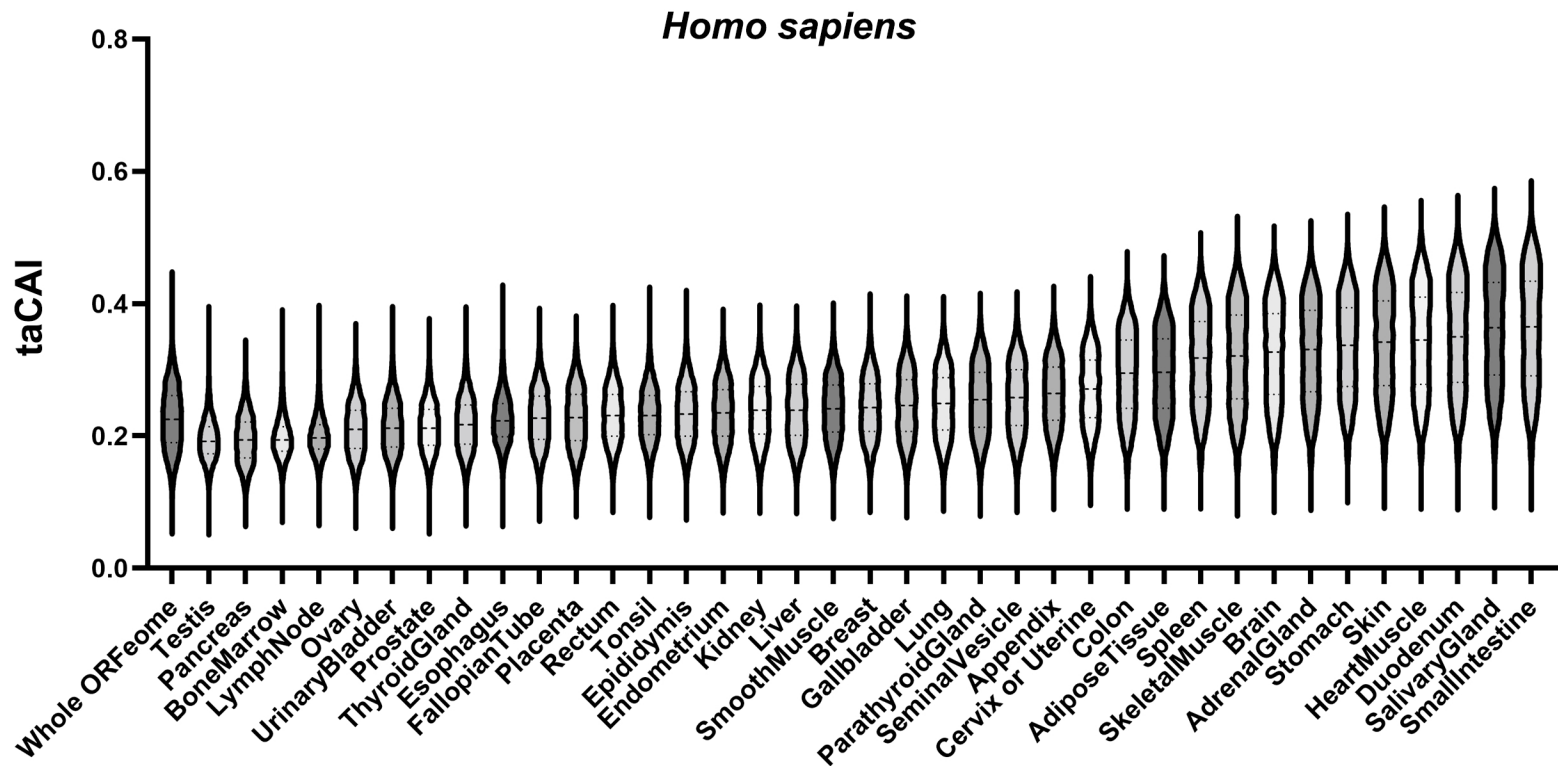

Supplement: supp [file elife_poa_e76893_Figure_4_figure_supplement_2.pdf › elife_poa_e76893_Figure_4_figure_supplement_2.pdf]

Figure 4 - Figure Supplement 3

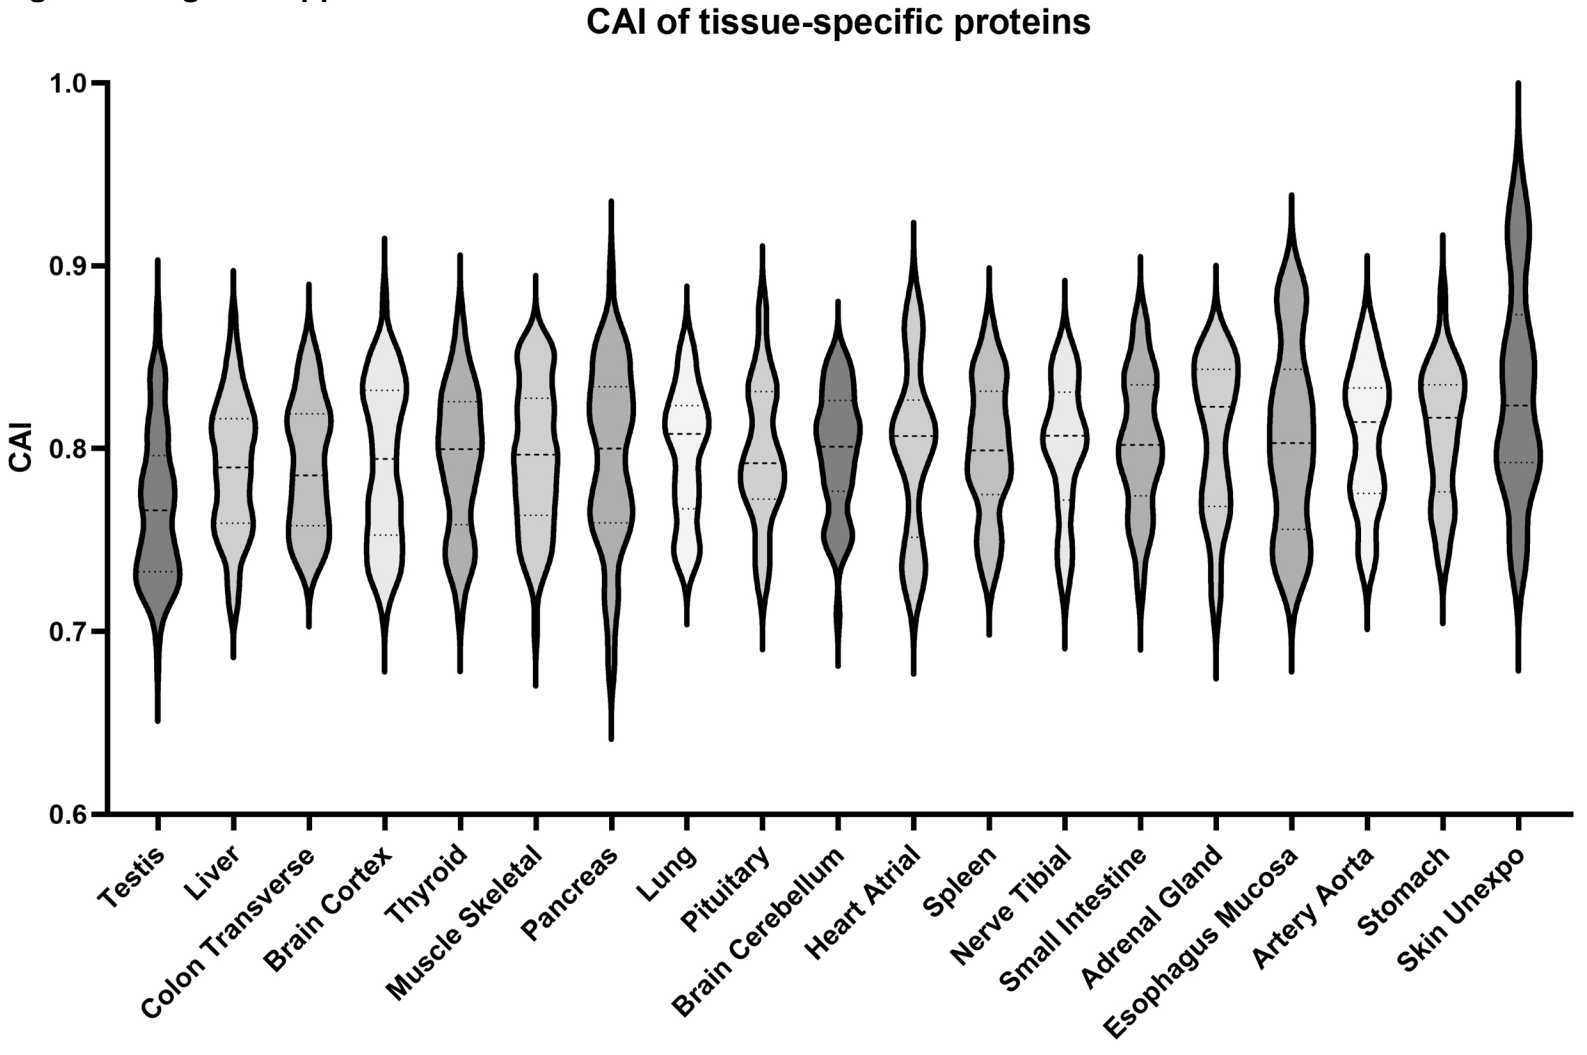

Supplement: supp [file elife_poa_e76893_Figure_4_figure_supplement_3.pdf › elife_poa_e76893_Figure_4_figure_supplement_3.pdf]

Figure 5 - Figure Supplement 1

A

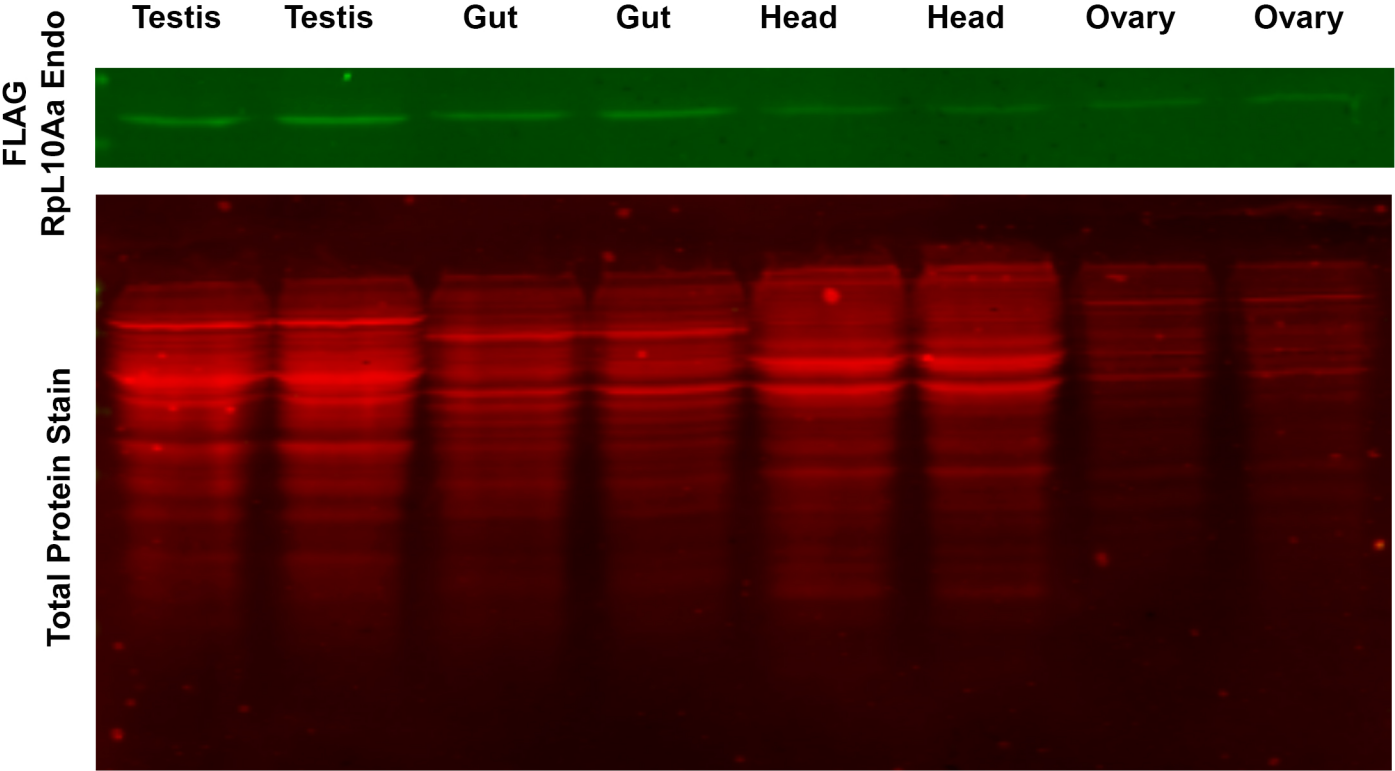

B

RpL10Aa Endo Protein Levels

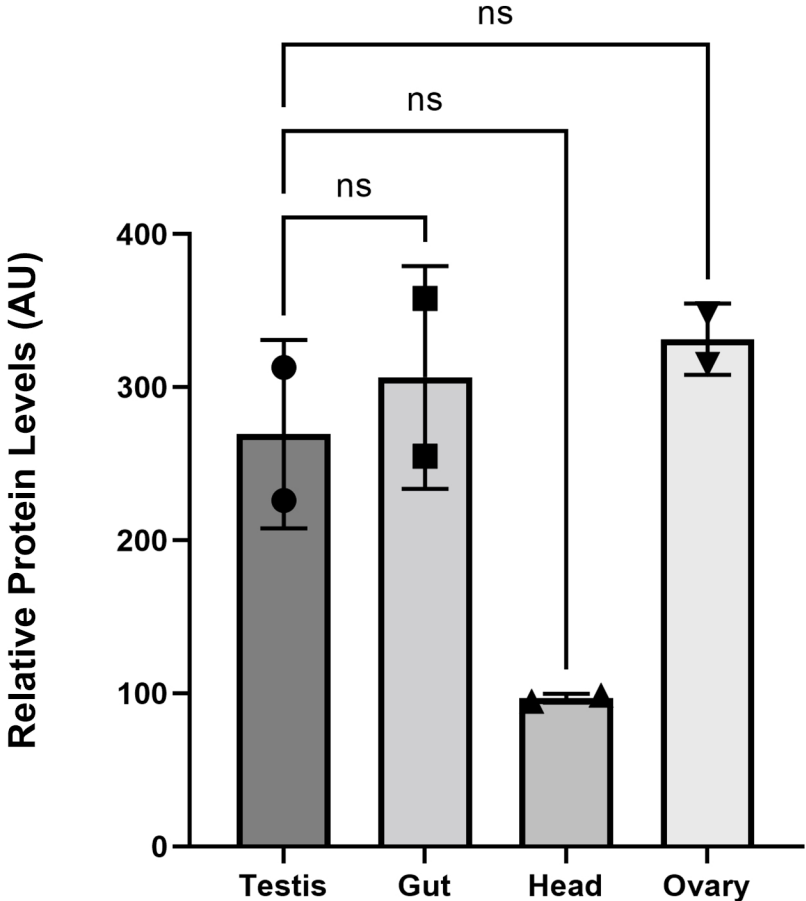

Supplement: supp [file elife_poa_e76893_Figure_5_figure_supplement_1.pdf › elife_poa_e76893_Figure_5_figure_supplement_1.pdf]

Figure 5 - Figure Supplement 2

A

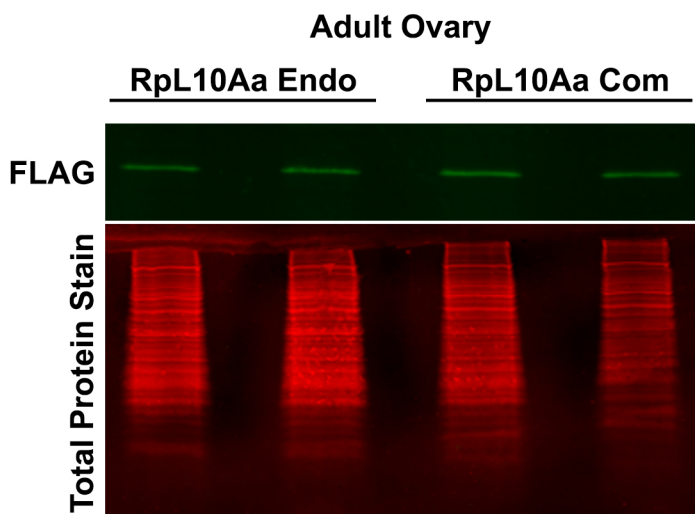

B

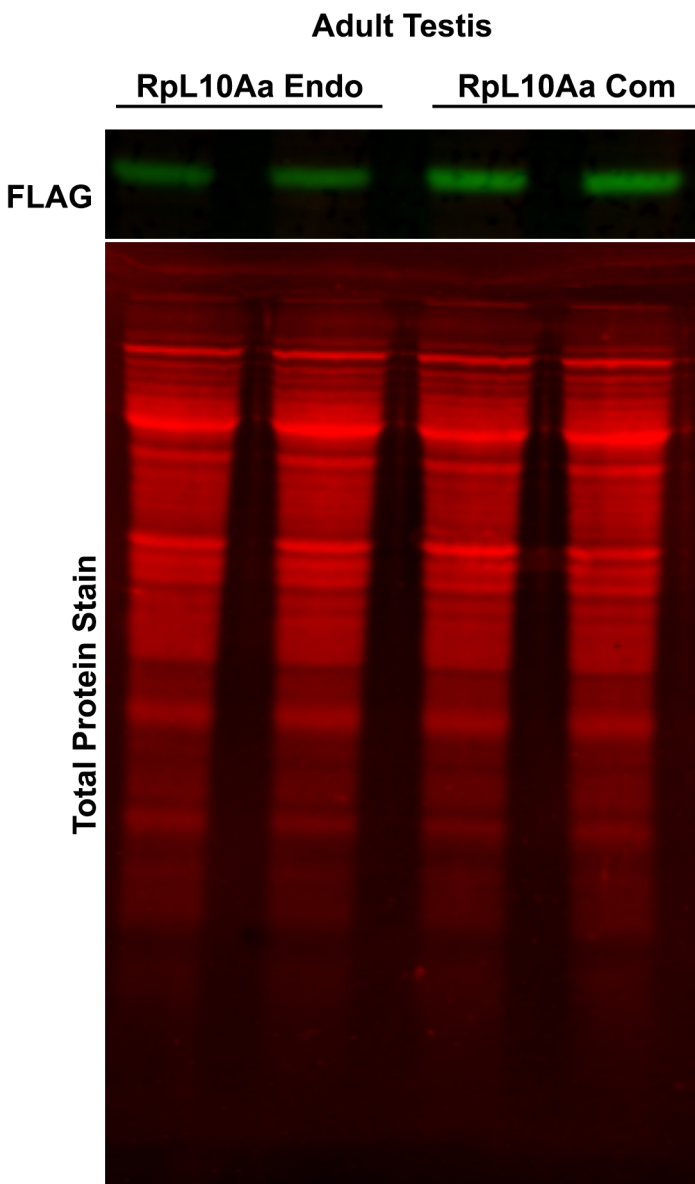

Supplement: supp [file elife_poa_e76893_Figure_5_figure_supplement_2.pdf › elife_poa_e76893_Figure_5_figure_supplement_2.pdf]
